# Supplementary material for: Supramolecular structures fabricated through the epitaxial growth of semiconducting poly(3-hexylthiophene) on carbon nanotubes as building blocks of nanoscale electronics
Source: Royal Society of Chemistry journal article supplement (doi:10.1039/c4cp02089h), 2014-01-01
Supplement: c4cp02089h1.pdf [file c4cp02089h1.pdf]

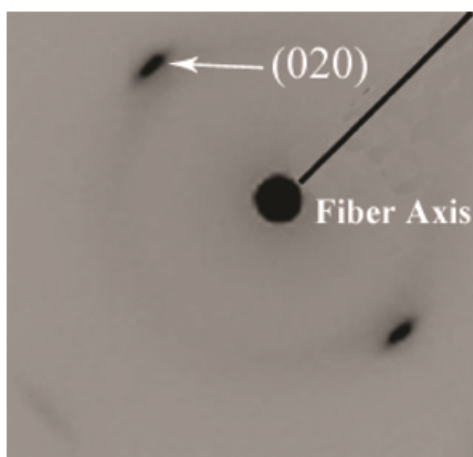

**Supplementary Figure S1.** Electron diffraction pattern of oriented poly(3hexylthiophene) on carbon nanotubes.

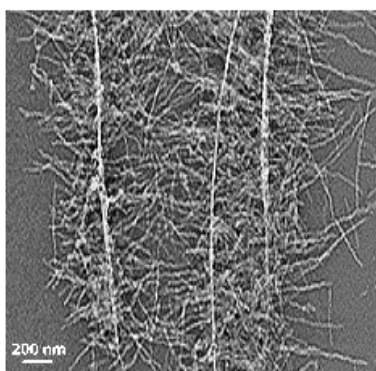

**Supplementary Figure S2.** Low magnification electron micrograph of p3ht crystallized on cnts as nanofibers.

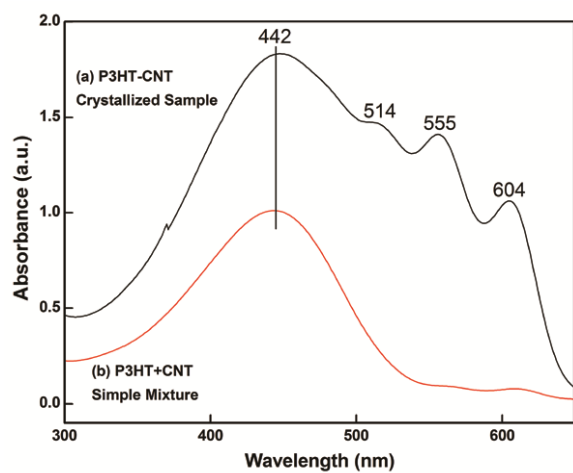

**Supplementary Figure S3.** A relative comparison of (a) optical spectra of p3ht crystallized on cnts for 3 h, and (b) a simple mixture of p3ht + cnt. The optical spectra of the simple mixture of p3ht and cnts shows a broad band of p3ht at 442 nm. On the other hand, during crystallization, p3ht chains interacts with cnts such that there is a small shift toward the higher wavelength. This is envisaged to lead to uncoiling of isolated p3ht chains with consequent increase in the conjugation chain length.

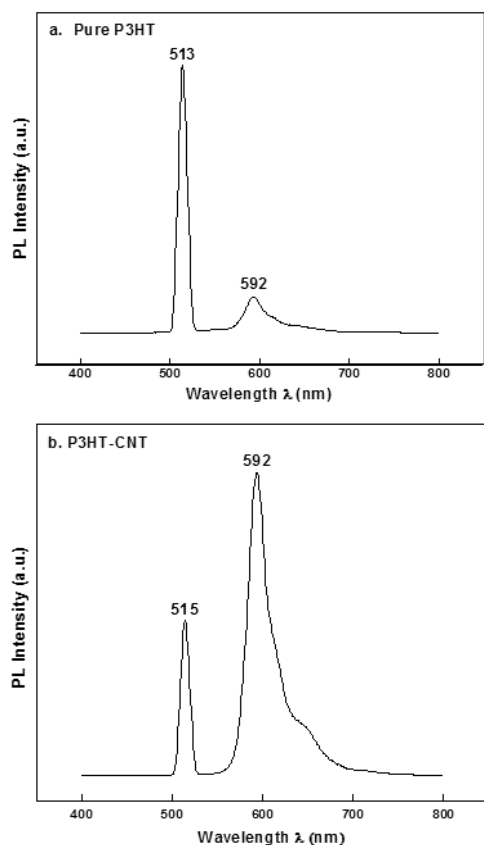

**Supplementary Figure S4.** The photoluminescence spectra of pure p3ht and p3ht crystallized on cnts crystallized for 30 min. the pl spectra of pure p3ht exhibits a high intensity emission maximum at 513 nm and low intensity peak at 592 nm. On the other hand, the pl spectra of the hybrid p3ht-cnt exhibits a relatively low intensity peak at 515 nm and a high intensity 592 nm peak. This is due to the photoluminescence quenching and lower degree of phase separation of p3ht after crystallization on cnts.
